# Supplementary material for: The Association between Embryo Development and Chromosomal Results from PGT-A in Women of Advanced Age: A Prospective Cohort Study
Source: MDPI journal article supplement (doi:10.3390/jcm13020626), 2024-01-22
Supplement: s1 [file s1]

**Supplementary Table S1** Aneuploid results from PGT-A

| PGT-A results, n (%) | ≥35 to <38 (n = 127) | ≥38 to <40 (n = 95) | ≥40 (n = 103) | Total (n = 325) | p-value |
|----------------------|----------------------|---------------------|---------------|-----------------|---------|
| <b>Monosomy</b>      | 20 (38.46)           | 14 (24.56)          | 12 (14.46)    | 46 (23.96)      | 0.017   |
| <b>Trisomy</b>       | 9 (17.31)            | 12 (21.05)          | 13 (15.66)    | 34 (17.71)      |         |
| <b>Complex</b>       | 23 (44.23)           | 31 (54.39)          | 58 (69.88)    | 112 (58.33)     |         |

**Supplementary Table S2** Association of embryo development and chromosomal results from PGT-A in different age groups

|                  | Euploid, n (%) | Abnormal chromosome, n (%) | p-value      |
|------------------|----------------|----------------------------|--------------|
| ≥35 to <38       |                |                            |              |
| Good development | 27 (67.50)     | 13 (32.50)                 | <b>0.024</b> |
| Poor development | 40 (45.98)     | 47 (54.02)                 |              |
| ≥38 to <40       |                |                            |              |
| Good development | 15 (48.39)     | 16 (51.61)                 | <b>0.052</b> |
| Poor development | 18 (28.12)     | 46 (71.88)                 |              |
| ≥40              |                |                            |              |
| Good development | 6 (37.50)      | 10 (62.50)                 | <b>0.072</b> |
| Poor development | 13 (14.94)     | 74 (85.06)                 |              |

**Supplementary Table S3** Multivariate logistic regression analysis

|                    | RR (95% CI)       | p-value           |
|--------------------|-------------------|-------------------|
| <b>Female age</b>  |                   |                   |
| ≥35 to <38         | 2.48 (1.61, 3.83) | <b>&lt; 0.001</b> |
| ≥38 to <40         | 1.67 (1.03, 2.70) |                   |
| ≥40                | 1                 |                   |
| <b>Development</b> |                   |                   |
| Good               | 1.02 (0.73, 1.43) | <b>0.913</b>      |
| Poor               | 1                 |                   |
